# Supplementary material for: Photoluminescence quenching and electron transfer in CuInS2/ZnS core/shell quantum dot and FePt nanoparticle blend films
Source: Royal Society of Chemistry journal article supplement (doi:10.1039/c5ra04542h), 2015-01-01
Supplement: c5ra04542h1.pdf [file c5ra04542h1.pdf]

Cite this: DOI: 10.1039/c0xx00000x

www.rsc.org/xxxxxx

ARTICLE TYPE

## Photoluminescence Quenching and Electron Transfer in CuInS<sub>2</sub>/ZnS Core/Shell Quantum Dot and FePt Nanoparticle Blend Films

Jie Hua,<sup>a,b</sup> Haibo Cheng,<sup>a</sup> Xi Yuan,<sup>a</sup> Yan Zhang,<sup>a</sup> Mei Liu,<sup>a</sup> Xiangdong Meng,<sup>a</sup> Haibo Li<sup>\*a,b</sup> and Jialong Zhao<sup>\*a</sup>

5 Received (in XXX, XXX) Xth XXXXXXXXXX 20XX, Accepted Xth XXXXXXXXXX 20XX

DOI: 10.1039/b000000x

### Supporting Information

Table S1 Elemental composition of CuInS<sub>2</sub>/ZnS QDs

| Sample (Cu:In) | Cu    | In    | Zn    | S     | Cu/In |
|----------------|-------|-------|-------|-------|-------|
| QD1 (1/1)      | 14.66 | 12.88 | 21.93 | 50.59 | 1.13  |
| QD2 (1/3)      | 5.78  | 6.87  | 34.52 | 52.83 | 0.83  |
| QD3 (1/6)      | 6.95  | 10.42 | 33.93 | 48.7  | 0.67  |

10

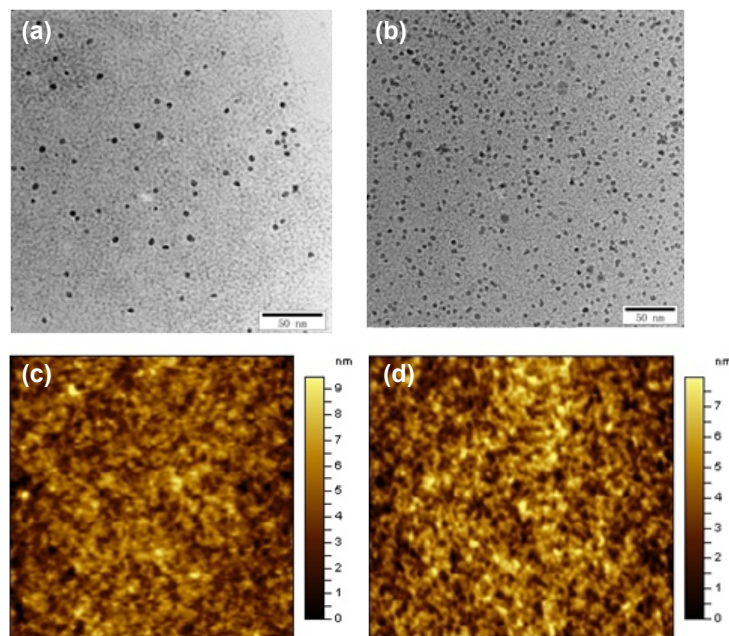

Fig. S1 TEM and AFM images for CuInS<sub>2</sub>-FePt dropped films with FePt/QD1 ratio of 0.2(a,c) and 2.0(b,d)

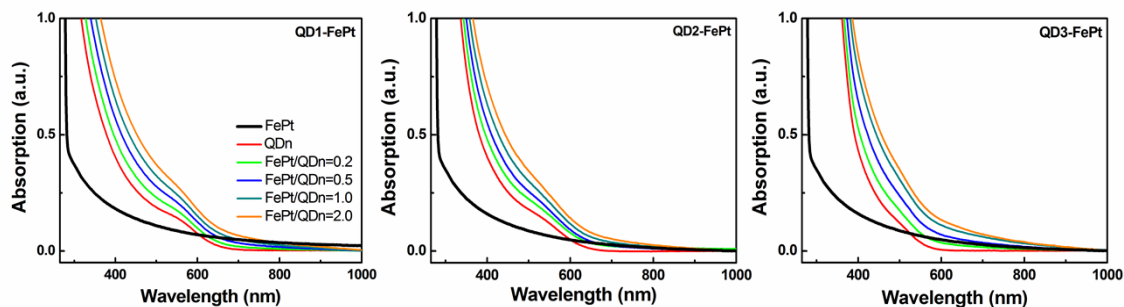

Fig. S2 Absorption spectra of FePt MNs, CuInS<sub>2</sub>/ZnS QDs and QDn-FePt mixed colloids in chloroform with different concentrations of FePt MNs.

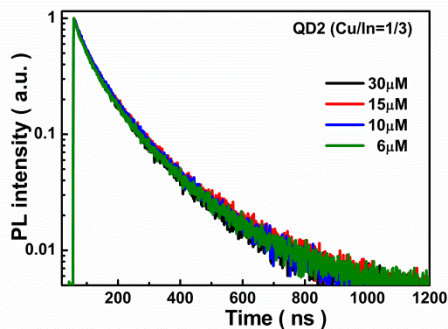

Fig. S3. PL decay curves of CuInS<sub>2</sub>/ZnS core/shell QDs (Cu/In=1/3) with different concentration.

5 **Table S2** Fitting parameters of PL decay curves for QD1-QD3 with different concentration of FePt MNs.

| Sample (QD1) | FePt/QD | $\tau_1$ | $A_1$ | $\tau_2$ | $A_2$ | $\tau_{AV}$ |
|--------------|---------|----------|-------|----------|-------|-------------|
|              | 0.0     | 20.4     | 0.62  | 110.9    | 0.39  | 90.0        |
|              | 0.2     | 16.2     | 0.60  | 99.6     | 0.40  | 83.1        |
|              | 0.5     | 15.0     | 0.61  | 90.8     | 0.39  | 78.4        |
|              | 1.0     | 10.6     | 0.62  | 81.4     | 0.38  | 71.2        |
| Sample (QD2) | 0.0     | 57.5     | 0.56  | 167.4    | 0.44  | 135.2       |
|              | 0.2     | 34.2     | 0.51  | 129.7    | 0.49  | 110.8       |
|              | 0.5     | 26.3     | 0.47  | 118      | 0.53  | 102.9       |
|              | 1.0     | 25.5     | 0.57  | 111      | 0.43  | 92.5        |
|              | 2.0     | 20.5     | 0.58  | 108      | 0.42  | 89.8        |
| Sample (QD3) | 0.0     | 76.0     | 0.53  | 204      | 0.47  | 166.1       |
|              | 0.2     | 39.6     | 0.44  | 151      | 0.56  | 132.1       |
|              | 0.5     | 27.1     | 0.46  | 126      | 0.54  | 110.8       |
|              | 1.0     | 19.4     | 0.48  | 109      | 0.52  | 96.4        |
|              | 2.0     | 16.5     | 0.54  | 110      | 0.46  | 96.2        |

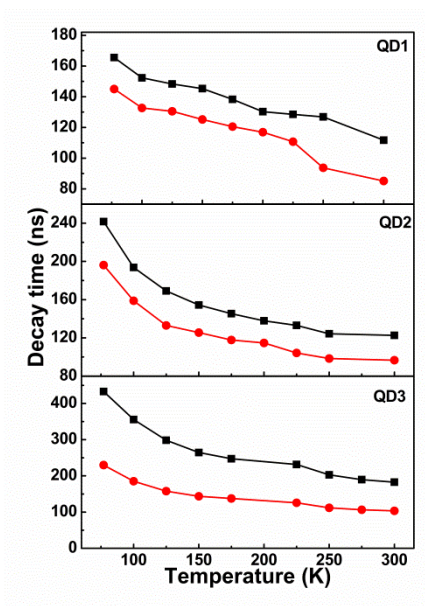

**Fig. S4** Temperature-dependent PL decay times  $\tau_{AV}$  of QDn and QDn-FePt blend films (n=1, 2, 3) at different temperatures from 80 to 300 K. Black solid squares refer to the pure CuInS<sub>2</sub> QDs films and red solid circles represent the CuInS<sub>2</sub> QD-FePt MN blend films.
